# Supplementary material
Source: publisher figshare collection journal article supplement (https://frontiersin.figshare.com/ndownloader/files/14606600)
Supplement: Supplementary file 1 [file 14606600]

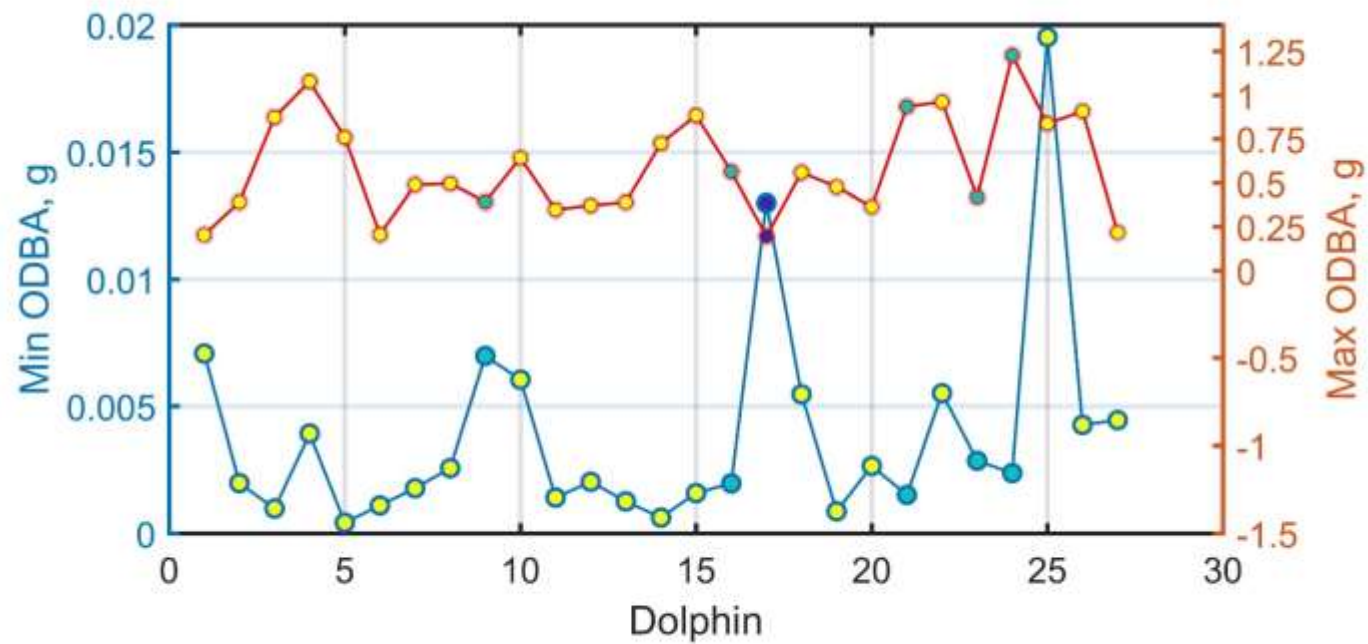

**Figure S1 Supp Series of minimum (left-axis) and maximum (right-axis) ODBA recorded on each tag deployment.** Colors correspond to age class of the dolphins; blue, juvenile; green, sub-adult and yellow, adult. Note that min and max ODBA are represented on different axes.

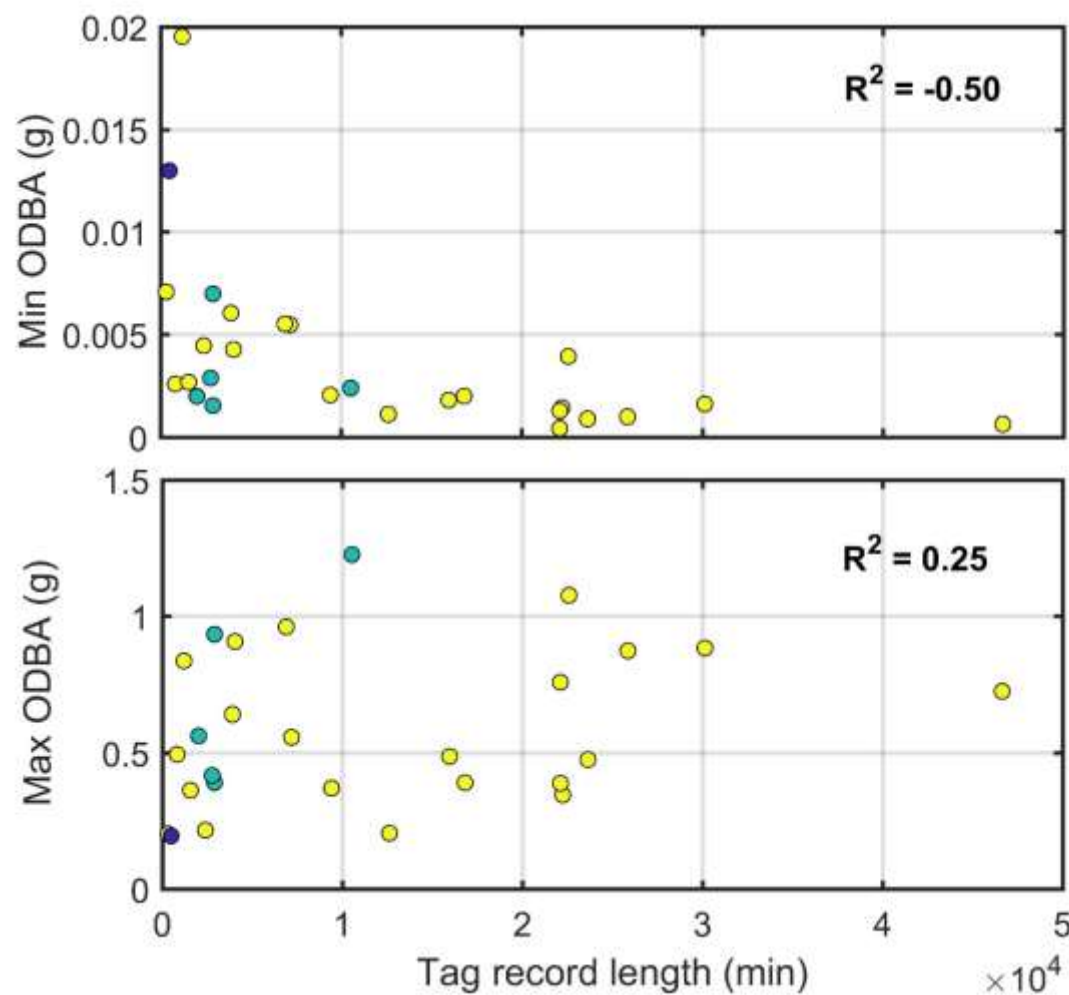

**Figure S2 Supp Maximum and minimum recorded ODBA on each tag as a function of duration of the deployment.** Colors correspond to age class of the dolphins; blue, juvenile; green, sub-adult and yellow, adult.

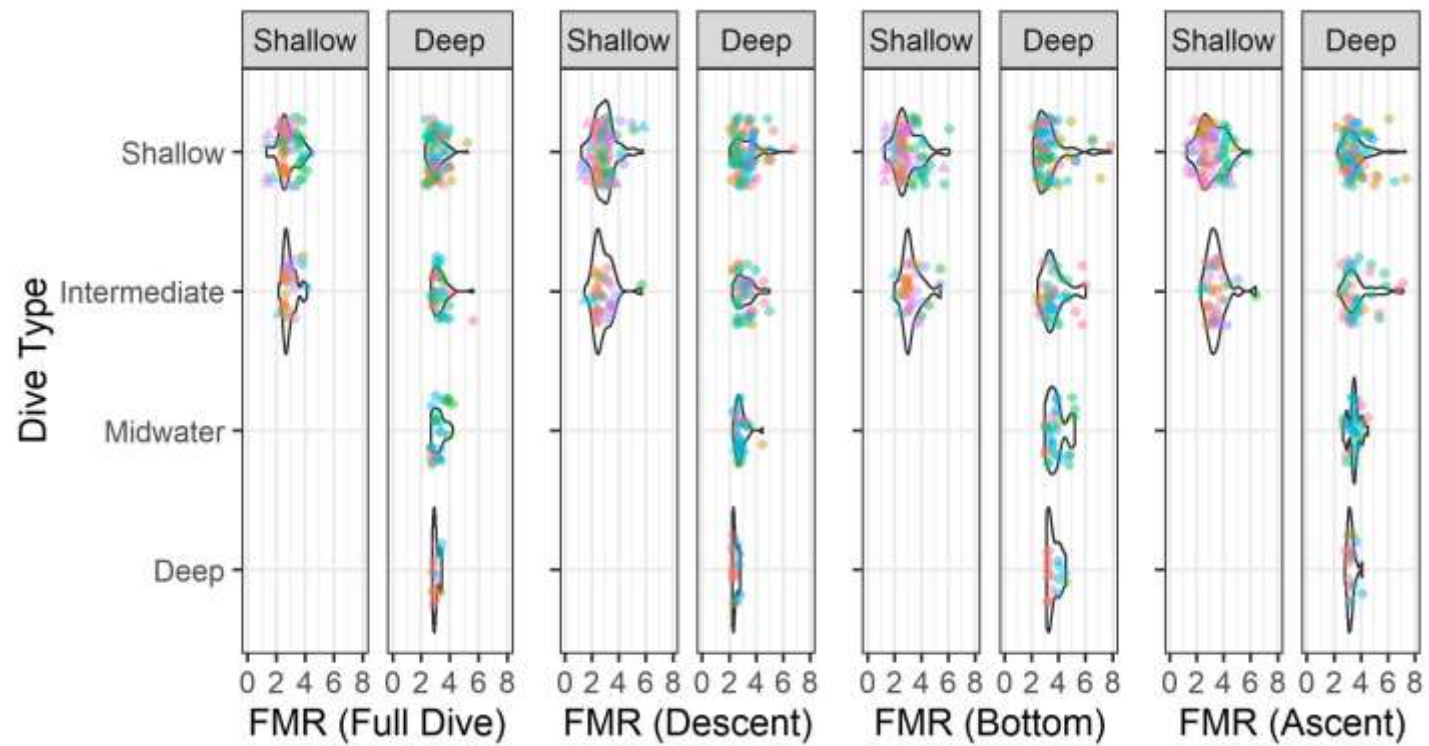

**Figure S3 Supp. Estimates of field metabolic rate in Risso's dolphins by dive type and phase.** Multi-panel violin plot of kernel probability density colored by individual dolphin, different shapes correspond to age class (dots represent adults and triangles non-adults) and separate panels correspond to each habitat. See GLMMs (Generalized linear mixed models) results in the text.

**Table S1 Supp. Estimated resting metabolic rates ( $\dot{V}O_{2\min}$ ) and maximum metabolic rates ( $\dot{V}O_{2\max}$ ) for 300 and 500 kg body weight Risso's dolphins.** The method used for estimating  $\dot{V}O_{2\min}$  is specified in the column headers,  $\dot{V}O_{2\max}$  is computed as scaling up  $\dot{V}O_{2\min}$  by 5 times (Savage et al. 2007).

| Method             | Eq 3.2 in Fahlman et al.<br>(2018) |      | Fig 3B in Fahlman et al.<br>(2018) |      | Kleiber<br>(1947) |      |
|--------------------|------------------------------------|------|------------------------------------|------|-------------------|------|
|                    | 300                                | 500  | 300                                | 500  | 300               | 500  |
| $\dot{V}O_{2\min}$ | 0.61                               | 0.75 | 1.17                               | 1.95 | 0.71              | 1.04 |
| $\dot{V}O_{2\max}$ | 3.04                               | 3.79 | 5.85                               | 9.75 | 3.5               | 5.2  |
